# Supplementary material for: Standardizing data reporting in the research community to enhance the utility of open data for SARS-CoV-2 wastewater surveillance
Source: Royal Society of Chemistry journal article supplement (doi:10.1039/d1ew00235j), 2021-01-01
Supplement: d1ew00235j1.xlsx [file d1ew00235j1.xlsx]

## Sheet: TableS1
	Table S1. Full list of variables considered during workshop discussion. Variables that were considered required in the CDC NWSS data reporting structure at the time of our workshop are marked with an asterisk (*). The CDC NWSS reporting structure also includes variables related to MIQE / dMIQE guidelines which were excluded from workshop discussion and are therefore not fully listed here.
		Wastewater Treatment Plant / Infrastructure	Sample Collection	Sample Processing	Target Quantification
	original set of variables (from CDC NWSS data reporting structure)	Wastewater treatment plant design flow*	Sample type (e.g. grab, 24-hr flow-weighted composite, 24-hr time-weighted composite)*	Sample concentration method*	PCR type (e.g. qPCR, droplet digital PCR)*
		Wastewater treatment plant population served*	Composite frequency*	Nucleic acid extraction method*	Human normalization target
		Percent industrial input	Sample matrix (e.g. raw wastewater, primary sludge)*	Pre-concentration storage time	Human normalization concentration
		Combined or separated system?	Sample location (e.g. primary influent, primary sludge, upstream)*	Pre-concentration storage temperature	Date sample quantified*
		Is influent stored prior to treatment to modulate flow rate?	Pre-lab storage time	Pre-extraction storage time	SARS-CoV-2 concentration (back-calculated to unconcentrated sample basis; e.g. copies/L wastewater, copies/g solids)*
		Sewage travel time	Pre-lab storage temperature	Pre-extraction storage temperature	SARS-CoV-2 concentration standard error (back-calculated to unconcentrated sample basis)*
		NPDES permit number*	Sample pre-treatment type (e.g. pasteurization, chemical preservative)	Sample volume concentrated	SARS-CoV-2 concentration 95% confidence interval (back-calculated to unconcentrated sample basis)*
		Wastewater treatment plant name*	Sample collection date*	Use of extraction blanks	Identification of samples below limits of detection/quantification*
		State or Territory*	Sample collection time*	Recovery control name (e.g. BCoV)	Methods to determine limits of detection & quantification*
		Names of all counties/jurisdictions serviced*	Flow rate*	Recovery control spike matrix (e.g. raw sample, sample concentrate, lysis buffer)
		ZIP Code of wastewater treatment plant*	pH	Recovery control spike concentration
			Conductivity	Equivalent sewage amount (volume/mass) in PCR reaction*
			TSS	Recovery efficiency (percent)*
			Sample temperature
	additional variables identified by participants	Sewershed area (zip codes / census tracts / GIS shapefiles / map)	Total organic carbon	Use of recovery control	SARS-CoV-2 target gene(s)*
		Pretreatment before headworks (e.g. chlorination)		Nucleic acid quality / concentration (e.g. Nanodrop / Qubit)	Assessment of inhibition*
		Inclusion of waste from areas outside service area (e.g. septage truck delivery)		Inhibition control*	Replication of PCR reactions?
		Flow (minimum / maximum / average; hourly / daily / weekly / monthly / yearly)		Number of freeze/thaw cycles for wastewater sample	Type of reference standard*
		Sewershed population served		Number of freeze/thaw cycles for RNA extract	Optimal thermal profiles for each target
		GPS coordinates of WWTP			Variation of biological replicates
		Non-sewered system sampling			Primer selection*
